# Supplementary material
Source: Springer Nature journal article supplement (https://hal.science/hal-01290635v1/file/13567_2014_387_MOESM1_ESM.pdf)
Supplement: MOESM1 [file 13567_2014_387_MOESM1_ESM.pdf]

# Stages

***Leishmania* Free**  
(All diagnostic tests negative)

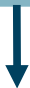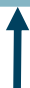

**Exposed / Subpatent**  
(PCR+ but culture -,  
Healthy dog)

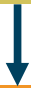

**Asymptomatic or  
Symptomatic disease**  
(PCR + and culture +, with or without clinical  
signs or lab abnormalities)

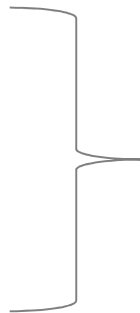

**No Evidence** of  
active infection

**Active Infection**
